# Supplementary material for: Seneca Valley Virus 3Cpro Substrate Optimization Yields Efficient Substrates for Use in Peptide-Prodrug Therapy
Source: PubMed Central journal article supplement (PMC4466507; doi:10.1371/journal.pone.0129103), 2015-06-12
Supplement: pone.0129103.s006.pdf [file pone.0129103.s006.pdf]

| Name                    | Primer Sequence                                                                         |
|-------------------------|-----------------------------------------------------------------------------------------|
| 1-HRV                   | 5'-GGGGTACCCTGGAAGTTCTGTTCCAGGGTCCGGGTGGTGGTAGCGGTGG-3'                                 |
| 2-L/VP4                 | 5'-GGGGTACCATCGTTTACGAACTGCAGGGTAACGGTGGTGGTAGCGGTGG-3'                                 |
| 3-VP4/VP2               | 5'-GGGGTACCCCGCTGGGTTACCTGAAAGACCACGGTGGTGGTAGCGGTGG-3'                                 |
| 4-VP2/VP3               | 5'-GGGGTACCGGAACCGACGAAGAACAGGGTCCGGGTGGTGGTAGCGGTGG-3'                                 |
| 5-VP3/VP1               | 5'-GGGGTACCCCGTCTTACGTTTTCCACTCTACCGGTGGTGGTAGCGGTGG-3'                                 |
| 6-VP1/2A                | 5'-GGGGTACCCAGAAAATGCTGATGCAGTCTGGTGGTGGTGGTAGCGGTGG-3'                                 |
| 7-2B/2C                 | 5'-GGGGTACCAAAGTGTTCAAAATGCAGGGTCCGGGTGGTGGTAGCGGTGG-3'                                 |
| 8-2C/3A                 | 5'-GGGGTACCCAGACCCTGGTTCTGCAGTCTCCGGGTGGTGGTAGCGGTGG-3'                                 |
| 9-3A/3B                 | 5'-GGGGTACCAAAGCTCCGCGTTCTGAAAACGCTGGTGGTGGTAGCGGTGG-3'                                 |
| 10-3B/3C                | 5'-GGGGTACCTCTCTGATGGAAATGCAGCAGCCGGGTGGTGGTAGCGGTGG-3'                                 |
| 11-3C/3D                | 5'-GGGGTACCCCGCTGGCTACCATGCAGGGTCTGGGTGGTGGTAGCGGTGG-3'                                 |
| 12-L/VP4.1              | 5'-GGGGTACCATCGTTTACGAACTGCAGGGTCCGGGTGGTGGTAGCGGTGG-3'                                 |
| 13-2B/2C.1              | 5'-GGGGTACCAAAGTGTTCAAAATGCAGGGTAACGGTGGTGGTAGCGGTGG-3'                                 |
| 14-L/VP4.2              | 5'-GGGGTACCATCGTTTACGAACCGCAGGGTCCGGGTGGTGGTAGCGGTGG-3'                                 |
| 15-L/VP4.3              | 5'-GGGGTACCATCGTTTTCGAACTGCAGGGTCCGGGTGGTGGTAGCGGTGG-3'                                 |
| 16-L/VP4.4              | 5'-GGGGTACCATCGTTATGGAAGTGCAGGGTCCGGGTGGTGGTAGCGGTGG-3'                                 |
| 17-L/VP4.5              | 5'-GGGGTACCGTTTACGAACTGCAGGGTCCGGGTGGTGGTAGCGGTGG-3'                                    |
| 18-L/VP4.6              | 5'-GGGGTACCTACGAACTGCAGGGTCCGGGTGGTGGTAGCGGTGG-3'                                       |
| 19-L/VP4.7              | 5'-GGGGTACCGAACTGCAGGGTCCGGGTGGTGGTAGCGGTGG-3'                                          |
| 20-L/VP4.8              | 5'-GGGGTACCCTGCAGGGTCCGGGTGGTGGTAGCGGTGG-3'                                             |
| 21-L/VP4.9              | 5'-GGGGTACCATCGTTTACGAACTGCAGAGCCCGGGTGGTGGTAGCGGTGG-3'                                 |
| 22-pB33CGSY R           | 5'-ACATGCATGCGGCCACCTT-3'                                                               |
| 23-3CProtease F         | 5'-GGGGACAAGTTTGTACAAAAAAGCAGGCTTCGAAAACCTGTACTTCCAGGATTATAAAGATGAACAGCCCAACGTGGACAT-3' |
| 24-3CProtease R         | 5'-GGGGACCACTTTGTACAAGAAAGCTGGGTTTATTGCATTGTGGCCAAAGG-3'                                |
| 25-C16A<br>3CProtease F | 5'-TACAAAGGATGGGCGGCTCGGCCCTG-3'                                                        |
| 26-C16A<br>3CProtease R | 5'-GATGTTTCCTACCCGGCCGAGCCGGGA-3'                                                       |
